# Supplementary material for: One-pot synthesis of Pd@Pt core–shell nanocrystals for electrocatalysis: control of crystal morphology with polyoxometalate
Source: Royal Society of Chemistry journal article supplement (doi:10.1039/c6ce00816j), 2016-01-01
Supplement: c6ce00816j1.pdf [file c6ce00816j1.pdf]

Electronic Supplementary Information (ESI) for

**One-pot synthesis of Pd@Pt core-shell nanocrystals for electrocatalysis:  
control of crystal morphology with polyoxometalate**

Ji Hyun Seog,<sup>‡a</sup> Dongheun Kim,<sup>‡b</sup> Yena Kim,<sup>‡c</sup> Nam Soo Kim,<sup>b</sup> Sang Bok Lee<sup>\*ab</sup> and Sang  
Woo Han<sup>\*c</sup>

<sup>a</sup> *Graduate School of Nanoscience and Technology, KAIST, Daejeon 34141, Korea*

<sup>b</sup> *Department of Chemistry and Biochemistry, University of Maryland, College Park,  
Maryland 20742, USA. E-mail: slee@umd.edu*

<sup>c</sup> *Center for Nanotectonics, Department of Chemistry and KI for the NanoCentury, KAIST,  
Daejeon 34141, Korea. E-mail: sangwoohan@kaist.ac.kr*

<sup>‡</sup> These authors contributed equally to this work.

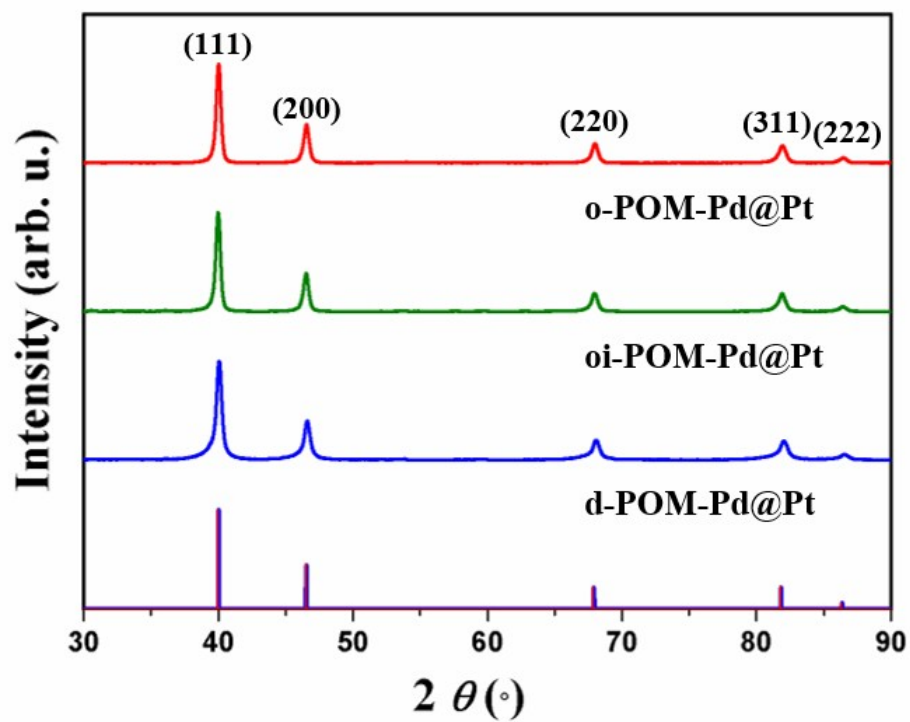

**Fig. S1.** XRD patterns of the o-POM-Pd@Pt, oi-POM-Pd@Pt, and d-POM-Pd@Pt NCs. The intensities and positions for pure Pd (blue lines at the bottom) and Pt (red lines at the bottom) references were taken from the JCPDS database.

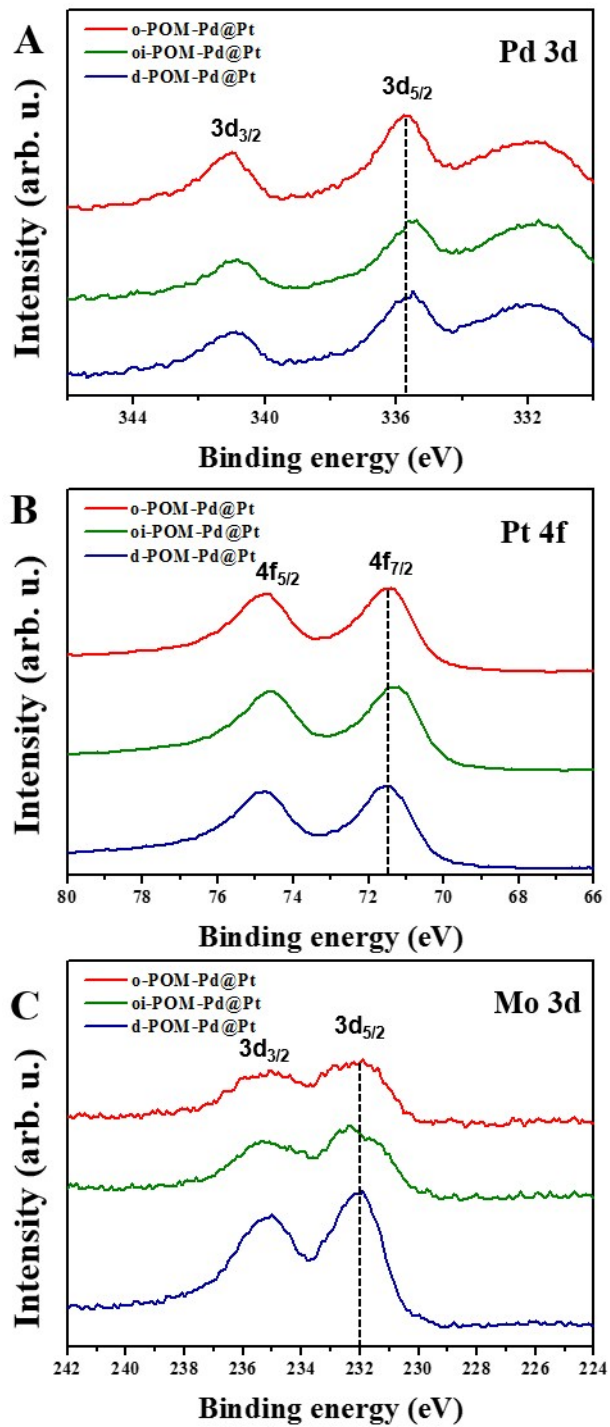

**Fig. S2.** XPS spectra of the o-POM-Pd@Pt, oi-POM-Pd@Pt, and d-POM-Pd@Pt NCs for (A) Pd 3d, (B) Pt 4f, and (C) Mo 3d core levels.

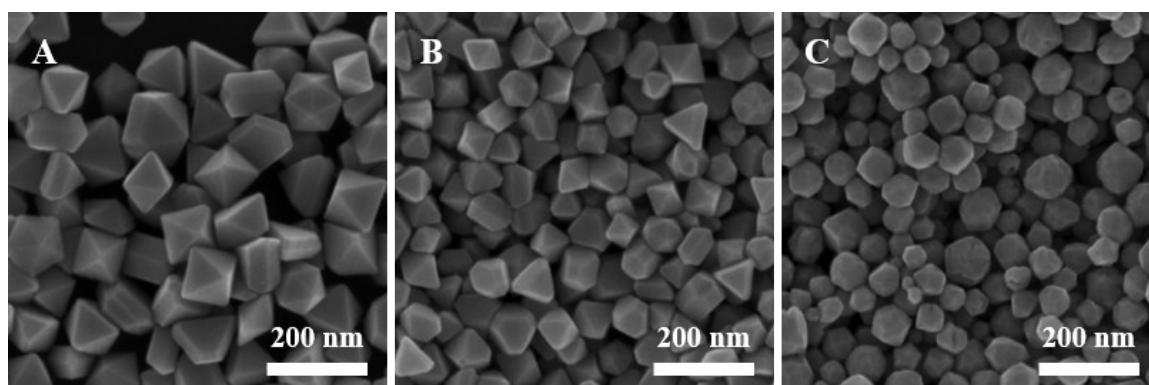

**Fig. S3.** SEM images of the products prepared without the Pt precursors under otherwise similar experimental conditions to those employed in the synthesis of the (A) o-POM-Pd@Pt, (B) oi-POM-Pd@Pt, and (C) d-POM-Pd@Pt NCs.

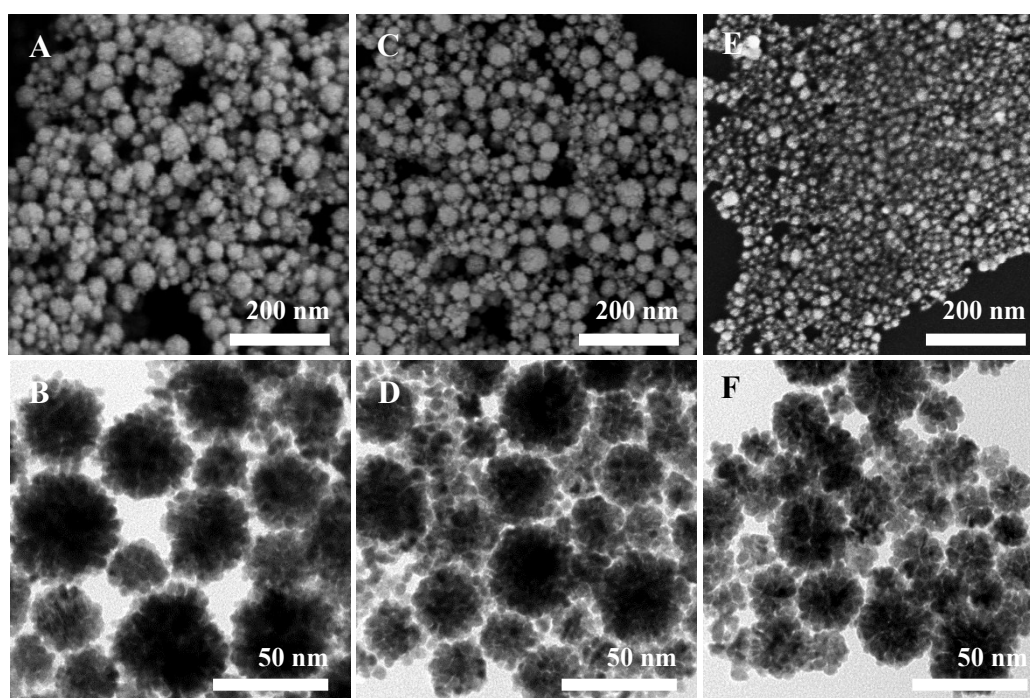

**Fig. S4.** (A, C, E) SEM and (B, D, F) TEM images of the products prepared using sodium citrate as a stabilizing agent instead of the POMs under otherwise similar experimental conditions to those employed in the synthesis of the (A, B) o-POM-Pd@Pt, (C, D) oi-POM-Pd@Pt, and (E, F) d-POM-Pd@Pt NCs.

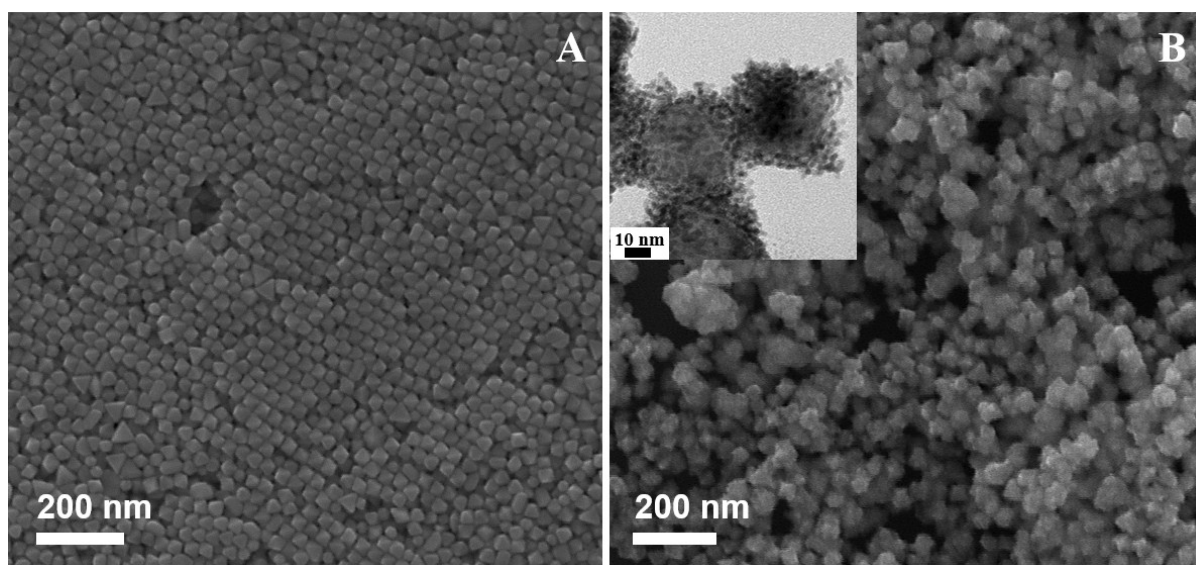

**Fig. S5.** SEM images of the (A) octahedral Pd NC seeds and (B) d-Pd@Pt NCs. TEM image of the d-Pd@Pt NCs is shown in the inset of (B). The average edge lengths of the octahedral Pd NC seeds and the d-Pd@Pt NCs were 35 and 51 nm, respectively.

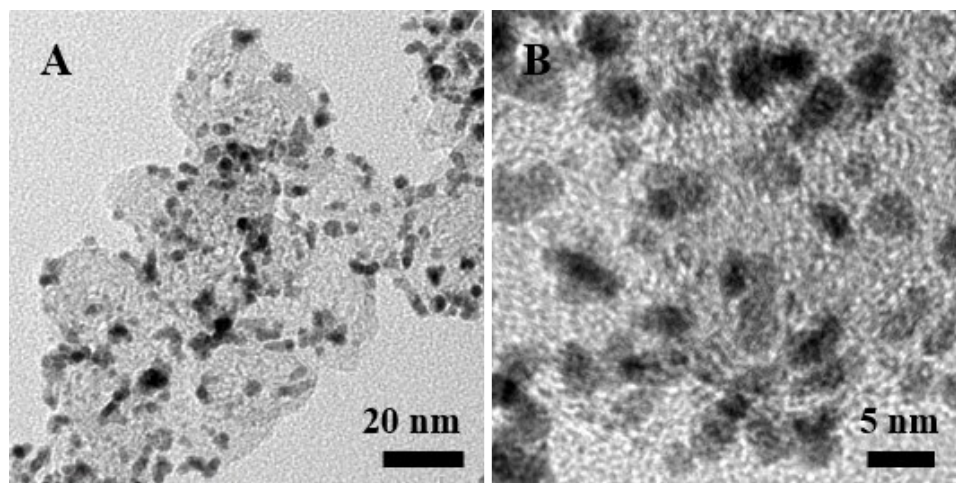

**Fig. S6.** (A) Low- and (B) high-magnification TEM images of the commercial Pt/C catalyst. The average Pt particle size of the Pt/C was 5 nm.

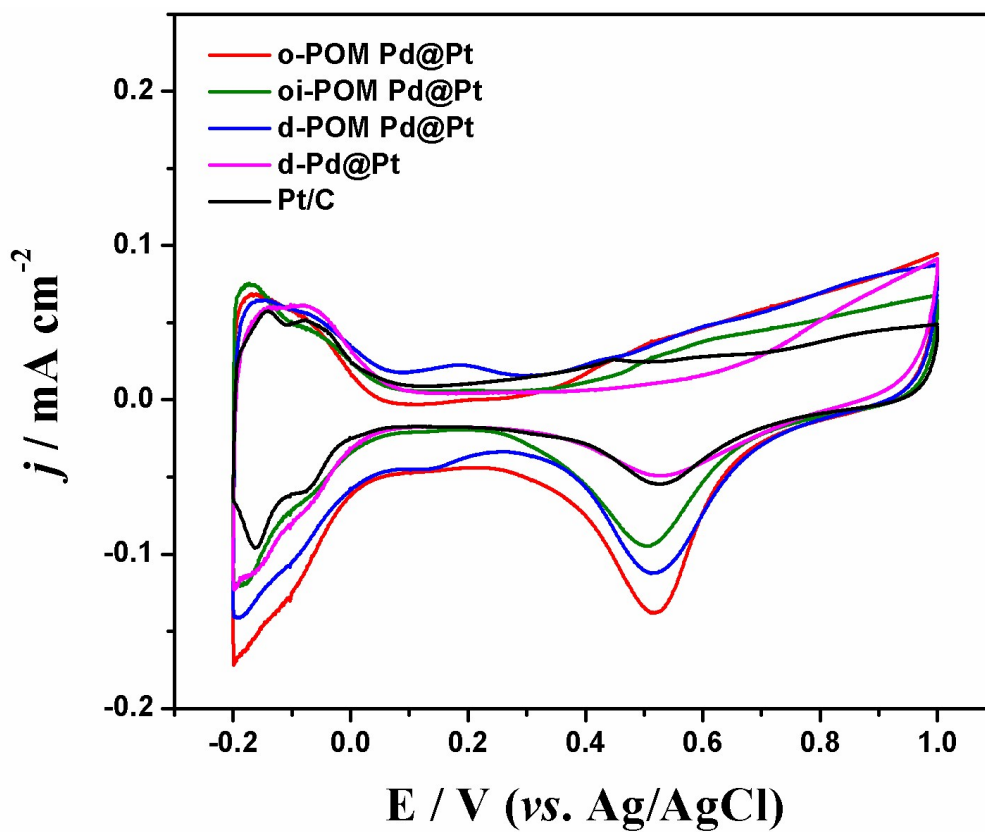

**Fig. S7.** CVs obtained with the various catalysts in 0.1 M  $\text{HClO}_4$  at a scan rate of  $50 \text{ mVs}^{-1}$ . The current values were normalized to the ECSAs of the catalysts.

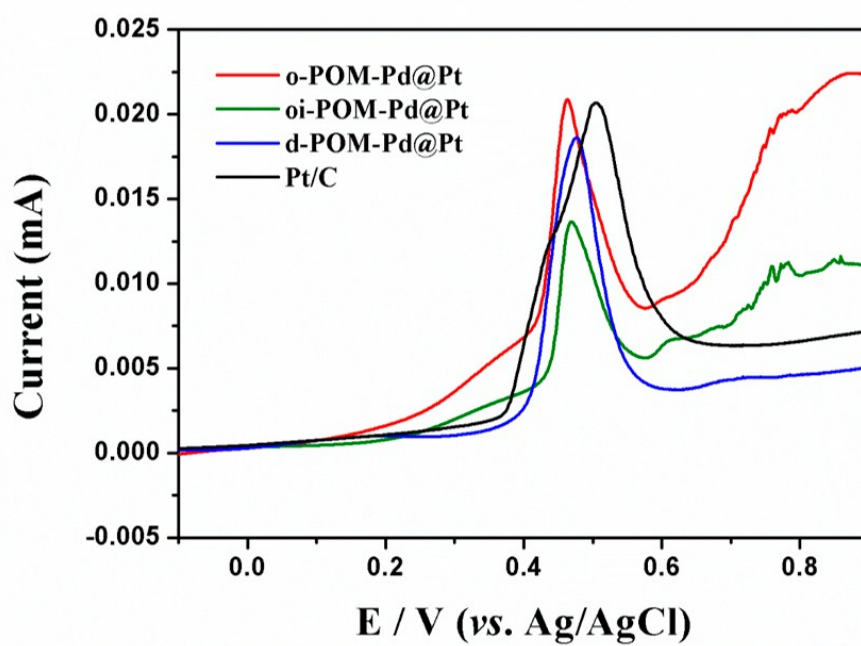

**Fig. S8.** CO-stripping voltammograms obtained with the various catalysts in 0.1 M HClO<sub>4</sub> at a scan rate of 20 mV s<sup>-1</sup>.
